# Supplementary material
Source: PubMed Central journal article supplement (PMC4433790)
Supplement: NIHMS676856-supplement-1.pdf [file NIHMS676856-supplement-1.pdf]

**Supplementary Table I.** Frequency (%) of T-bet, IL-22, and IL-17A expression in GM-CSF<sup>+</sup> T cells of healthy donors

|                                                                  | <b>CD4<sup>+</sup></b> | <b>CD8<sup>+</sup></b> |
|------------------------------------------------------------------|------------------------|------------------------|
| Total T-bet <sup>+</sup> (%)                                     | 10.6 ± 2.9             | 23.6 ± 3.3             |
| Total GM-CSF <sup>+</sup> T-bet <sup>+</sup> (%)                 | 5.1 ± 2.3              | 8.9 ± 1.6              |
| T-bet <sup>+</sup> in GM-CSF <sup>+</sup> IFN-γ <sup>+</sup> (%) | 52.9 ± 11.9            | 77.1 ± 4.2             |
| T-bet <sup>+</sup> in GM-CSF <sup>+</sup> IFN-γ <sup>-</sup> (%) | 6.1 ± 1.4              | 5.2 ± 1.1              |
| T-bet <sup>+</sup> in GM-CSF <sup>-</sup> IFN-γ <sup>+</sup> (%) | 36.8 ± 5.7             | 63.4 ± 8.2             |
|                                                                  |                        |                        |
| Total IL-22 <sup>+</sup> (%)                                     | 1.6 ± 0.5              | 0.4 ± 0.1              |
| GM-CSF <sup>+</sup> IL-22 <sup>+</sup> (%)                       | 1.1 ± 0.4              | 0.27 ± 0.1             |
| IL-22 <sup>+</sup> in GM-CSF <sup>+</sup> IFN-γ <sup>+</sup> (%) | 6.4 ± 0.4              | 1.2 ± 0.6              |
| IL-22 <sup>+</sup> in GM-CSF <sup>+</sup> IFN-γ <sup>-</sup> (%) | 11.6 ± 3.4             | 4.6 ± 1.8              |
|                                                                  |                        |                        |
| Total IL-17A <sup>+</sup> (%)                                    | 1.44 ± 0.2             | 0.52 ± 0.1             |
| GM-CSF <sup>+</sup> IL-17A <sup>+</sup> (%)                      | 0.37 ± 0.1             | 0.26 ± 0.1             |

Supplementary Figure 1.

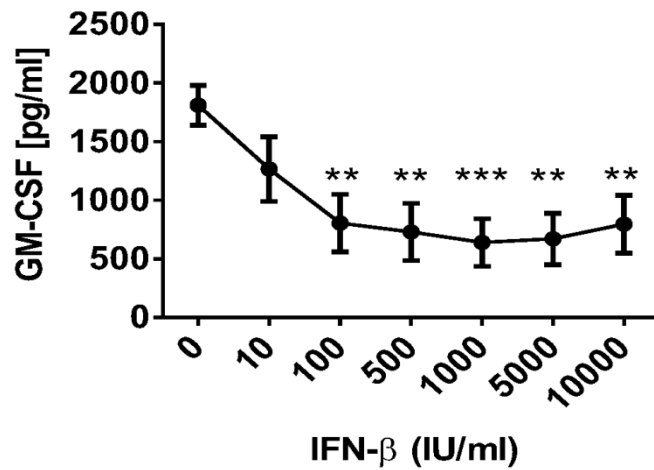

**Supplementary Figure 1. IFN-β suppresses GM-CSF production by T cells in a dose-dependent manner.** PBMCs from healthy donors (n=4) were stimulated with anti-CD3 and anti-CD28 Abs in the presence of IFN-β (0-10000 IU/ml) for five days. Concentrations of GM-CSF in cell culture supernatants were measured by ELISA. \*\* p<0.01, \*\*\* p<0.001 (Paired, two-tailed Student t-test).

Supplementary Figure 2.

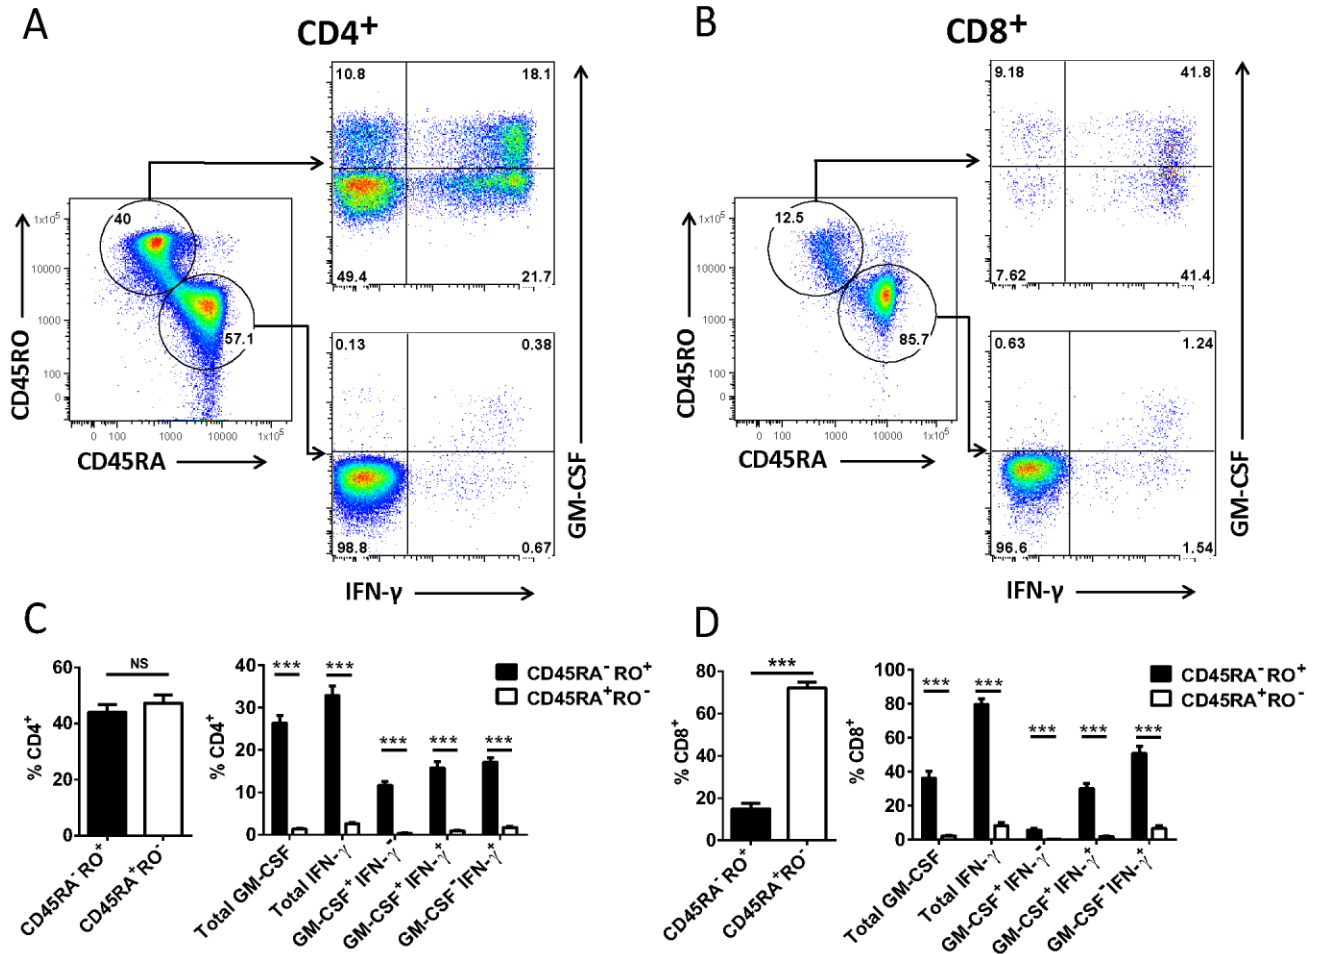

**Supplementary Figure 2. PB CD45RA<sup>-</sup>RO<sup>+</sup> CD4<sup>+</sup> and CD8<sup>+</sup> cells express GM-CSF and IFN- $\gamma$ .** PBMCs from healthy donors (n=10) were activated with PMA/iono/GP, stained for CD4, CD8, CD45RA, CD45RO, GM-CSF, and IFN- $\gamma$ , and analyzed by flow cytometry. Representative dot-plots of GM-CSF- and IFN- $\gamma$ -expressing CD4<sup>+</sup> (**A**) and CD8<sup>+</sup> (**B**) T cells within CD45RA<sup>+</sup>RO<sup>-</sup> and CD45RA<sup>-</sup>RO<sup>+</sup> T cell subpopulations of one donor. Summary (%) of CD4<sup>+</sup> (**C**) and CD8<sup>+</sup> T cells (**D**) that express GM-CSF and IFN- $\gamma$  among total CD45RA<sup>+</sup>RO<sup>-</sup> and CD45RA<sup>-</sup>RO<sup>+</sup> T cells. Mean  $\pm$  SEM, \*\*\* p < 0.001, NS: not significant (Unpaired, two-tailed Student t-test).
